# Supplementary material for: A Novel Helper Phage Enabling Construction of Genome-Scale ORF-Enriched Phage Display Libraries
Source: PubMed Central journal article supplement (PMC3785514; doi:10.1371/journal.pone.0075212), 2013-09-27
Supplement: pone.0075212.s001.pdf [file pone.0075212.s001.pdf]

**Table S1.** Analysis of random clones after treatment of primary phages (P01) with various concentrations of trypsin.

| Trypsin concentration                   | I. Fold reduction in titre | II. Aligning to <i>M. tb</i> genome | III. ORFs in-frame with <i>PelB<sub>SS</sub></i> and <i>gIII<sub>p</sub></i> * | IV. Aligning to the <i>M. tb</i> proteome † |
|-----------------------------------------|----------------------------|-------------------------------------|--------------------------------------------------------------------------------|---------------------------------------------|
| <b>A. MTBLIB25 Library (100-300 bp)</b> |                            |                                     |                                                                                |                                             |
| Without trypsin                         | -                          | 100 (32/32)                         | -                                                                              | -                                           |
| 10 µg/ml                                | 1 x 10 <sup>4</sup>        | 100 (32/32)                         | 93.7 (30/32)                                                                   | 40.0 (12/30)                                |
| 100 µg/ml                               | 4 x 10 <sup>4</sup>        | 100 (32/32)                         | 96.8 (31/32)                                                                   | 32.25 (10/31)                               |
| 200 µg/ml                               | 10 <sup>6</sup>            | 100 (32/32)                         | 93.7 (30/32)                                                                   | 33.33 (10/30)                               |
| <b>B. MTBLIB27 Library (300-800 bp)</b> |                            |                                     |                                                                                |                                             |
| Without trypsin                         | -                          | 100 (47/47)                         | -                                                                              | -                                           |
| 10 µg/ml                                | 1.3 x 10 <sup>4</sup>      | 100 (44/44)                         | 100 (44/44)                                                                    | 65.9 (29/44)                                |
| 100 µg/ml                               | 1.7 x 10 <sup>4</sup>      | 100 (44/44)                         | 93.2 (41/44)                                                                   | 53.6 (22/41)                                |
| 200 µg/ml                               | 10 <sup>5</sup>            | 97.7 (43/44)                        | 95.4 (42/44)                                                                   | 57.1 (24/42)                                |

Primary phages (10<sup>11</sup>) from the (A) MTBLIB25 library (100-300 bp) and (B) MTBLIB27 library (300-800 bp) were incubated with four different concentrations of trypsin (0, 10, 100 and 200 µg/ml) and then used to infect *E. coli* TOP10F<sup>2</sup> cells to determine the reduction in phage titer. Randomly selected clones were analyzed by PCR and DNA sequencing to estimate the percentage of ORF (genic and non-genic ORF) and non-ORF clones.

\* Percentage of clones in-frame with the *PelB* signal sequence and *gIII<sub>p</sub>* in the phagemid.

† Percentage of total in-frame clones from Stage III that aligned with the *M. tuberculosis* (*M. tb*) proteome (genic clones).

Number of positive clones/total clones analyzed is given in brackets.

**Table S2.** Size distribution of randomly sequenced clones at various stages of library construction.

| <b>A. MTBLIB25 Library (100-300 bp)</b> |                           |                           |                           |                           |
|-----------------------------------------|---------------------------|---------------------------|---------------------------|---------------------------|
| Size                                    | 1.<br>MTBLIB25C01<br>(95) | 2.<br>MTBLIB25P01<br>(47) | 3.<br>MTBLIB25C02<br>(48) | 4.<br>MTBLIB25P02<br>(48) |
| < 100 bp                                | 2                         | 2                         | 3                         | 2                         |
| 100 - 200 bp                            | 42                        | 25                        | 24                        | 29                        |
| 200 - 300 bp                            | 47                        | 20                        | 20                        | 17                        |
| > 300 bp                                | 1                         | -                         | 1                         | -                         |
| <b>B. MTBLIB27 Library (300-800 bp)</b> |                           |                           |                           |                           |
| Size                                    | 1.<br>MTBLIB27C01<br>(95) | 2.<br>MTBLIB27P01<br>(47) | 3.<br>MTBLIB27C02<br>(48) | 4.<br>MTBLIB27P02<br>(48) |
| < 300 bp                                | -                         | -                         | -                         | -                         |
| 300 - 400 bp                            | 21                        | 11                        | 15                        | 20                        |
| 400 - 500 bp                            | 36                        | 10                        | 16                        | 10                        |
| 500 - 600 bp                            | 20                        | 8                         | 9                         | 9                         |
| 600 - 700 bp                            | 10                        | 7                         | 4                         | 4                         |
| 700 - 800 bp                            | 4                         | 4                         | 2                         | 3                         |
| > 800 bp                                | 1                         | 4                         | -                         | -                         |

The total number of clones analyzed at each stage are indicated in brackets. 1, Transformants obtained after large-scale electroporation of the ligation sample; 2, transductants obtained after infection of TOP10F' cells with the primary phage library; 3, transductants obtained after infection of TOP10F' cells with the trypsin-treated ORF phages; 4, transductants obtained after infection of TOP10F' cells with the secondary phage library.

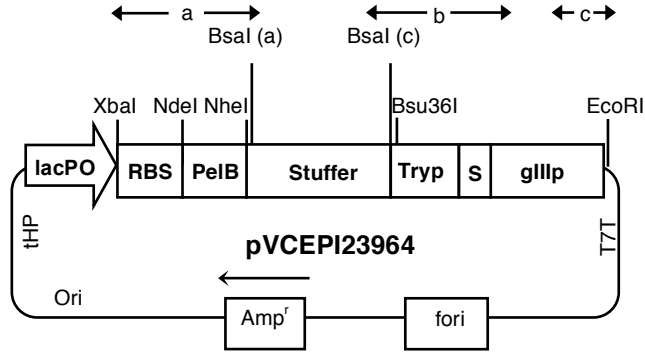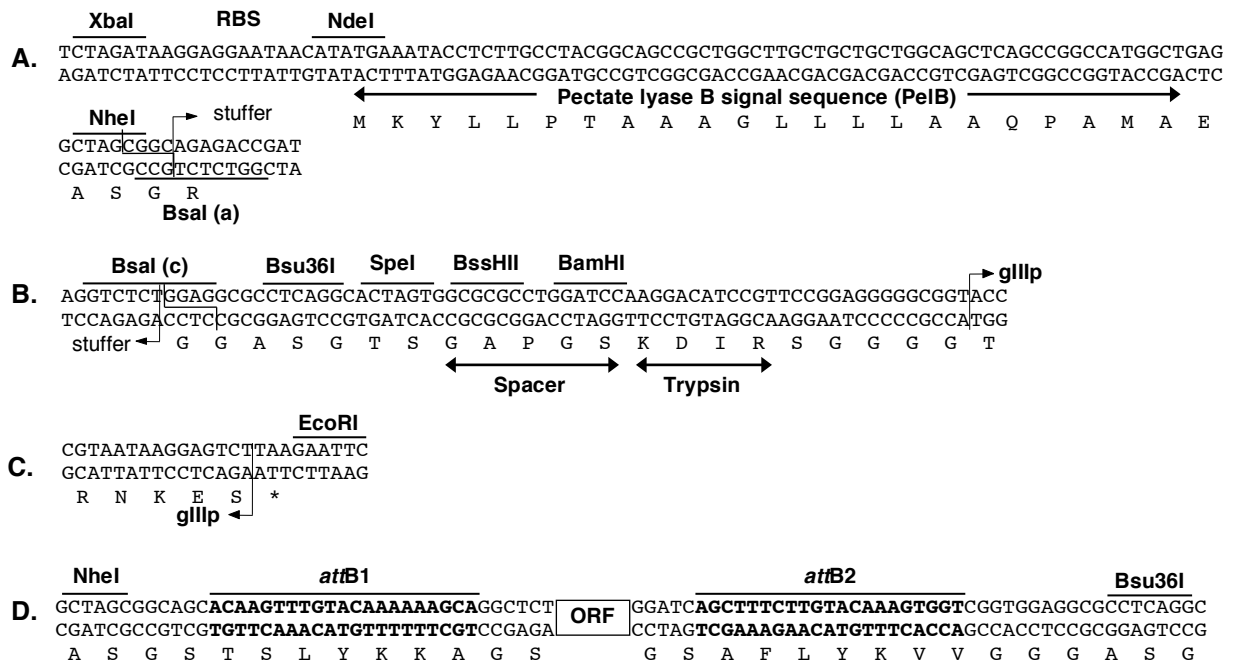

**Fig. S1: Schematic representation of the vector pVCEPI23964.**

Only the relevant genes and restriction sites are shown. The map is not to scale. lacPO, lac promoter-operator; RBS, ribosome-binding site; PelB, pectate lyase signal sequence; Stuffer, 1.8 Kbp nucleotide sequence flanked by *BsaI* sites (a) and (c); Tryp, trypsin protease cleavage site; S, spacer; gIIIp, segment encoding amino acid residues 2 - 405 of the gene III of filamentous phage; fori, origin of replication of filamentous phage; Amp<sup>r</sup>, β-lactamase gene; Ori, ColE1 origin of replication; tHP, transcriptional terminator. Details of regions marked a, b and c by double-headed arrows are shown in A, B and C, respectively. 'D' shows the sequence flanking the ORF after cloning into the phagemid vector harboring *attB1* and *attB2* site-specific recombination sites (in bold) based on Gateway Technology. Amino acids are shown in single-letter code below the nucleotide sequence. Restriction enzyme sites are shown above the nucleotide.

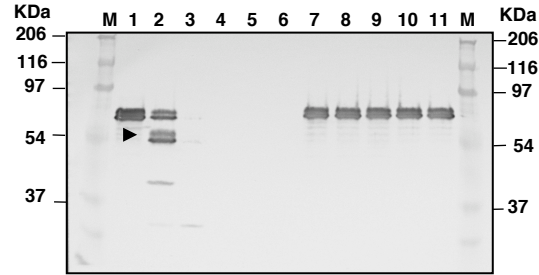

**Fig. S2: Western blot analysis of helper phages.**

Trypsin-untreated and -treated VCSM13 and AGM13 phages ( $1.5 \times 10^{10}$ ) were separated by 10% SDS-PAGE under reducing conditions, transferred onto 0.45  $\mu$  PVDF membranes and probed with anti-gIIIp MAb 30421, which targets an epitope located in the N2 domain of gIIIp from the bacteriophage M13. M, Prestained marker; Lane 1-5,  $1.5 \times 10^{10}$  VCSM13 phages treated with 0, 0.1, 1, 10 and 100  $\mu$ g/ml trypsin, respectively; Lane 6, empty; Lane 7-11,  $1.5 \times 10^{10}$  AGM13 phages treated with 0, 0.1, 1, 10 and 100  $\mu$ g/ml trypsin, respectively.
